# Supplementary material for: Identifying Opportunities for Advancing Weight Management in Primary Care
Source: PubMed Central journal article supplement — J Prim Care Community Health. 2019 Sep 9;10:2150132719870879. doi: 10.1177/2150132719870879 (PMC6734618; doi:10.1177/2150132719870879), 2019-09-09
Supplement: jpc-19-0087.pdf [file jpc-19-0087.pdf]

# Journal of Primary Care & Community Health

## Identifying Opportunities for Advancing Weight Management in Primary Care

|                  |                                                                                                                                                                                                                                                                                                                                                                                                                                                                                                                                                                                                                                                                                                                                                                                                                                                                                                                                                                                                                                                                                                                                                                                                                                                                                                                                                                                                                                                                                                                                                                                                                                                                                                                                                                                                                                                                                                                                                                                                                                                                                                                                                                                                                                                                                                        |
|------------------|--------------------------------------------------------------------------------------------------------------------------------------------------------------------------------------------------------------------------------------------------------------------------------------------------------------------------------------------------------------------------------------------------------------------------------------------------------------------------------------------------------------------------------------------------------------------------------------------------------------------------------------------------------------------------------------------------------------------------------------------------------------------------------------------------------------------------------------------------------------------------------------------------------------------------------------------------------------------------------------------------------------------------------------------------------------------------------------------------------------------------------------------------------------------------------------------------------------------------------------------------------------------------------------------------------------------------------------------------------------------------------------------------------------------------------------------------------------------------------------------------------------------------------------------------------------------------------------------------------------------------------------------------------------------------------------------------------------------------------------------------------------------------------------------------------------------------------------------------------------------------------------------------------------------------------------------------------------------------------------------------------------------------------------------------------------------------------------------------------------------------------------------------------------------------------------------------------------------------------------------------------------------------------------------------------|
| Journal:         | <i>Journal of Primary Care and Community Health</i>                                                                                                                                                                                                                                                                                                                                                                                                                                                                                                                                                                                                                                                                                                                                                                                                                                                                                                                                                                                                                                                                                                                                                                                                                                                                                                                                                                                                                                                                                                                                                                                                                                                                                                                                                                                                                                                                                                                                                                                                                                                                                                                                                                                                                                                    |
| Manuscript ID    | JPC-19-0087.R1                                                                                                                                                                                                                                                                                                                                                                                                                                                                                                                                                                                                                                                                                                                                                                                                                                                                                                                                                                                                                                                                                                                                                                                                                                                                                                                                                                                                                                                                                                                                                                                                                                                                                                                                                                                                                                                                                                                                                                                                                                                                                                                                                                                                                                                                                         |
| Manuscript Type: | Original Research                                                                                                                                                                                                                                                                                                                                                                                                                                                                                                                                                                                                                                                                                                                                                                                                                                                                                                                                                                                                                                                                                                                                                                                                                                                                                                                                                                                                                                                                                                                                                                                                                                                                                                                                                                                                                                                                                                                                                                                                                                                                                                                                                                                                                                                                                      |
| Keywords:        | obesity, primary care, community health centers, managed care, community health                                                                                                                                                                                                                                                                                                                                                                                                                                                                                                                                                                                                                                                                                                                                                                                                                                                                                                                                                                                                                                                                                                                                                                                                                                                                                                                                                                                                                                                                                                                                                                                                                                                                                                                                                                                                                                                                                                                                                                                                                                                                                                                                                                                                                        |
| Abstract:        | <p>Objective: Much has been written about the patients' perspective concerning weight management in health care. The purpose of this survey study was to assess perspectives of primary care providers (PCPs) and nurses toward patient weight management and identify possible areas of growth.</p> <p>Patients and Methods: We emailed a weight-management focused survey to 674 eligible participants (437 (64.8%) nurses and 237 (35.2%) PCPs) located in five outpatient primary care clinics. The survey focused on opportunities, practices, knowledge, confidence, attitudes and beliefs. A total of 219 surveys were returned (137 (62.6%) from nurses and 82 (34.4%) from PCPs).</p> <p>Results: Among 219 responders, 85.8% were female and 93.6% were white non-Hispanic. In this study, PCPs and nurses believed obesity to be a major health problem. While PCPs felt more equipped than nurses to address weight management (<math>p &lt; 0.001</math>) and reported receiving more training than nurses (50.0% vs 17.6%, respectively), both felt the need for more training on obesity (73.8% and 79.4%, respectively).</p> <p>Although, PCPs also spent more patient contact time providing weight management services vs. nurses (<math>p &lt; 0.001</math>), the opportunity/practices score was lower for PCPs than nurses (<math>-0.35 \pm 0.44</math> vs <math>-0.17 \pm 0.41</math>, <math>p &lt; 0.001</math>) with PCPs more likely to say they lacked the time to discuss weight and they worried it would cause a poor patient-PCP relationship. The knowledge/confidence score also differed significantly between the groups, with nurses feeling less equipped to deal with weight management issues than PCPs (<math>-0.42 \pm 0.43</math> vs <math>-0.03 \pm 0.55</math>, <math>p &lt; 0.001</math>).</p> <p>Neither group seemed very confident, with those in the PCP group only answering with an average score of neutral.</p> <p>Conclusion: By asking nurses and PCP general questions about experiences, attitudes, knowledge and opinions concerning weight management in clinical care, this survey has identified areas for growth in obesity management. Both PCPs and nurses would benefit from additional educational training on weight management.</p> |

1  
2  
3  
4  
5  
6  
7  
8  
9  
10  
11  
12  
13  
14  
15  
16  
17  
18  
19  
20  
21  
22  
23  
24  
25  
26  
27  
28  
29  
30  
31  
32  
33  
34  
35  
36  
37  
38  
39  
40  
41  
42  
43  
44  
45  
46  
47  
48  
49  
50  
51  
52  
53  
54  
55  
56  
57  
58  
59  
60

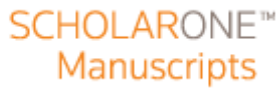

## Identifying Opportunities for Advancing Weight Management in Primary Care

**Abstract:**

**Objective:** Much has been written about the patients' perspective concerning weight management in health care. The purpose of this survey study was to assess perspectives of primary care providers (PCPs) and nurses toward patient weight management and identify possible areas of growth.

**Patients and Methods:** We emailed a weight-management focused survey to 674 eligible participants (437 (64.8%) nurses and 237 (35.2%) PCPs) located in five outpatient primary care clinics. The survey focused on opportunities, practices, knowledge, confidence, attitudes and beliefs. A total of 219 surveys were returned (137 (62.6%) from nurses and 82 (34.4%) from PCPs).

**Results:** Among 219 responders, 85.8% were female and 93.6% were white non-Hispanic. In this study, PCPs and nurses believed obesity to be a major health problem. While PCPs felt more equipped than nurses to address weight management ( $p < 0.001$ ) and reported receiving more training than nurses (50.0% vs 17.6%, respectively), both felt the need for more training on obesity (73.8% and 79.4%, respectively). Although, PCPs also spent more patient contact time providing weight management services vs. nurses ( $p < 0.001$ ), the *opportunity/practices* score was lower for PCPs than nurses ( $-0.35 \pm 0.44$  vs  $-0.17 \pm 0.41$ ,  $p < 0.001$ ) with PCPs more likely to say they lacked the time to discuss weight and they worried it would cause a poor patient-PCP relationship. The *knowledge/confidence score* also differed significantly between the groups, with nurses feeling less equipped to deal with weight management issues than PCPs ( $-0.42 \pm 0.43$  vs  $-0.03 \pm 0.55$ ,  $p < 0.001$ ). Neither group seemed very confident, with those in the PCP group only answering with an average score of neutral.

**Conclusion:** By asking nurses and PCP general questions about experiences, attitudes, knowledge and opinions concerning weight management in clinical care, this survey has identified areas for growth in obesity management. Both PCPs and nurses would benefit from additional educational training on weight management.

Identifying Opportunities for Advancing Weight Management in Primary Care

1  
2  
3  
4  
5  
6  
7  
8  
9  
10  
11  
12  
13  
14  
15  
16  
17  
18  
19  
20  
21  
22  
23  
24  
25  
26  
27  
28  
29  
30  
31  
32  
33  
34  
35  
36  
37  
38  
39  
40  
41  
42  
43  
44  
45  
46  
47  
48  
49  
50  
51  
52  
53  
54  
55  
56  
57  
58  
59  
60

**Abbreviations:**

BMI - Body Mass Index

DO – Doctor of Osteopathic Medicine

ECH – Employee Community Health

HCP- Health Care Provider

IRB – Institutional Review Board

LPN – Licensed Practical Nurse

MD – Medical Doctor

NP – Nurse Practitioner

PA – Physician Assistant

PCP - Primary Care Provider

RN – Registered Nurse

For Peer Review

## Identifying Opportunities for Advancing Weight Management in Primary Care

**Introduction**

Practice guidelines are well established for the management of patients with overweight and obesity issues which call for health care providers (HCPs) to identify, counsel and offer treatment management (i.e. ask, advise, treat).<sup>1,2</sup> HCPs include both nurses and primary care providers (PCPs). The nurses include Licensed Practical Nurses (LPNs), and Registered Nurses (RNs) while the PCPs include Physician Assistants (PAs), Nurse Practitioners (NPs), Medical Doctors (MDs) and Doctors of Osteopathic Medicine (DOs). In 2003, the United States Preventive Services Task Force (USPSTF) recommended that clinicians screen all adult patients for obesity and offer intensive counseling and behavioral interventions for weight management. In 2011, the Centers for Medicare and Medicaid Services delineated requirements for behavioral therapy for obesity;<sup>3</sup> the Obesity Expert Panel subsequently published practice guidelines to address weight management in the health care setting<sup>1</sup>.

A recent review of over 248 publications<sup>4</sup> concluded that primary care doctors and nurses were well positioned to give weight related health advice; however, advice provided was overall of poor quality mainly due to educational barriers and availability of resources. In a recent web based survey of over 330,000 medical professionals, 67% of respondents indicated that having more time with patients would improve their ability to counsel on obesity.<sup>5</sup> In addition, surveyed PCPs and nurses felt that their care of patients with obesity could be enhanced if given more time (70%), additional training in obesity management (53%), improved reimbursement (53%), and better tools to help patients recognize obesity risks (50%).<sup>5</sup>

Insufficient time and inadequate skills/training were the most frequently cited barriers in the literature that were associated with suboptimum implementation of the USPSTF guidelines on obesity management in primary care settings. A recent survey of family and pediatric practitioners identified lack of time (73%) as the most frequent barrier to pediatric obesity care.<sup>6</sup> This has been corroborated by a past analysis of 6368 primary care visits from 2005-2006 in the National Ambulatory Medical Care Survey (NAMCS).<sup>7</sup> In this survey it was found that the average primary care visit was 21.77 minutes and the time spent addressing weight related conditions was 5.65 minutes (30%), with only 1.75 minutes (8.0%) attributable to overweight and obesity.<sup>7</sup> The 8% included the amount of time spent to evaluate and treat patients with weight-related conditions that can be

## Identifying Opportunities for Advancing Weight Management in Primary Care

1  
2  
3 attributed to a single risk factor, excess weight (i.e., overweight and obesity). Given the time constraints across  
4 practices, the USPSTF has acknowledged the potential difficulty in offering an intensive intervention program  
5 on obesity and has suggested that clinicians can increase patient motivation to engage in weight loss, if they  
6 consider collaborative treatment with multidisciplinary teams,<sup>8</sup> which appears to be effective when they are  
7 being followed.<sup>9</sup> Unfortunately, these treatment guidelines continued to be under-utilized by PCPs,<sup>10-13</sup> who  
8 often felt unable to initiate intensive behavioral treatments. In a recent web based survey of 1506 practitioners,  
9 only 16% of the respondents indicated that obesity counseling should be provided according to the USPSTF  
10 guidelines, confirming significant gaps in HCP knowledge of the guidelines.<sup>12</sup>  
11  
12  
13  
14  
15  
16  
17  
18  
19

20 Previous studies utilizing patient surveys demonstrated that while patients believed that their PCP  
21 should have a role in their weight management, they perceived that the PCP may not necessarily have the skills  
22 needed to help them.<sup>14, 15</sup> The PCPs lack of knowledge for diagnosing obesity, lack of confidence, and need for  
23 more training in caring for patients with obesity had been corroborated by a number of recent studies.<sup>11, 16-18</sup> An  
24 earlier study showed that general practitioners' attendance at continuing professional development clearly  
25 increased their confidence to manage adult or childhood obesity.<sup>19</sup> Interestingly, a study of 25 residency  
26 program showed that residency programs averaged 2.8 hours per year of didactics in training on obesity,  
27 nutrition and physical activity related topics; whereas, the didactics were associated with greater knowledge  
28 (p=0.01), they were also associated with poorer attitudes (p <0.001) and poorer perception of professional norms  
29 (p=0.004) about counseling in this area.<sup>20</sup> As the authors indicate, this could be that didactics highlighted the  
30 complexity of the issue and created a sense of frustration at the enormous task involved in addressing this area,  
31 but it could have also reinforced a pervasive negativity toward it.  
32  
33  
34  
35  
36  
37  
38  
39  
40  
41  
42  
43  
44  
45

46 The overall purpose of this study was to evaluate the knowledge, experiences, attitudes and needs of the  
47 PCPs and nurses, within five outpatient community health clinics, regarding the delivery of weight management  
48 care to patients who are obese or overweight in order to identify opportunities for improving care to patients  
49 with overweight and obesity in primary care.  
50  
51  
52  
53  
54  
55  
56  
57  
58  
59  
60

## Identifying Opportunities for Advancing Weight Management in Primary Care

### **Methods:**

The present study was a cross-sectional survey of medical staff assigned to care of patients within the community health practices in a single institution. The medical staff surveyed included all LPNs, RNs, PAs, NPs, MDs and DOs, whose assignment was within the Employee Community Health (ECH) practice at a Midwest practice in the United States. This practice consists of three divisions: Community Pediatric and Adolescent Medicine, Family Medicine and Community Internal Medicine operating at 5 different free-standing local clinics.

This study was reviewed by The Institutional Review Board (IRB) and determined to be exempt under section 45 CFR 46.101, item 2. During the study, all significant changes to study design and procedures continued to be appropriately filed and reviewed by the IRB which continued exemption determination status.

### **Survey Development**

The survey focused on opportunities, practices, knowledge, confidence, attitudes and beliefs around weight management among PCP and nurses in a community health care setting. Ten of the 60 questions included in the survey had been used previously in other studies.<sup>11,21</sup> The additional 50 questions were developed by the study team. Pilot testing of the survey was conducted with 9 clinicians to assess the acceptability, readability, and understandability of the survey. The pilot survey underwent 4 rounds of testing and refinement before it was finalized. Due to the burden of a busy practice, efforts were made to keep the survey instrument very brief. The resulting survey took 5 minutes to complete.

Wording of the questions are found in Appendix Tables 1-5. A number of the questions had branching logic and a majority of the questions had Likert scale responses which included responses such as “strongly agree”, “agree”, “neutral”, “disagree” and “strongly disagree”. The seven overarching components of the survey were: 1) Demographics; 2) Training; 3) Beliefs/Opinions; 4) Knowledge; 5) Attitudes; 6) Practices; and 7) Perceived Needs.

All surveys consisted of an email which informed the subjects of the general purpose of the study, the fact that it the survey was voluntary, who to contact if they had any questions or complaints and that

## Identifying Opportunities for Advancing Weight Management in Primary Care

1  
2  
3 participation/nonparticipation did not jeopardize their care or employment at their institution. It also reassured  
4 all participants of the anonymity of the survey participation. If they did not wish to participate, they could  
5 ignore the email, if they wished to participate; they would follow the link at the bottom of the email. All non-  
6 responders received an email reminder 3 times before all correspondence ceased. There was no incentive to  
7 participate in this study.  
8  
9  
10  
11  
12

### **Data Collection and Response Rate**

13  
14  
15  
16  
17  
18 There were 719 PCPs and nurses identified for potential inclusion in the present study. Of these 45  
19 were excluded (10 had non-viable/incomplete email addresses, 9 were not PCPs (PhDs or other type of  
20 providers), and 26 had left the work unit. Among the 674 individuals who were surveyed, 437 (64.8%) were  
21 licensed nurses (159 were LPNs and 278 were RNs) and 237 (35.2%) were licensed PCPs (97 were NP or PA  
22 and 140 were MD or DO). For purposes of the present report “nurses” will refer to LPNs/RNs and “PCPs” will  
23 refer to NP/PA, MD/DO.  
24  
25  
26  
27  
28  
29

30  
31 The initial survey was sent through email on October 15, 2018; the non-responders received a reminder  
32 email with the survey attached on November 5, 2018; the final and third reminder email with attached survey  
33 was sent to non-responders on November 26, 2018. Study collection was closed on January 31, 2019. A  
34 detailed summary of the above is found in the consort diagram presented in Figure 1, which adheres to consort  
35 guidelines.<sup>22</sup>  
36  
37  
38  
39  
40  
41  
42

### **Data Analysis:**

43  
44  
45 Baseline demographics and training background information provided by the responders are  
46 summarized for continuous variables using mean, standard deviation, min and max and for categorical variables  
47 using frequency percentages. These variables were calculated in total and for both groups: *Nurses and PCPs*. A  
48 knowledge score with a potential value ranging from 0 to 5 was calculated for each individual as the sum of the  
49 number of correct responses to 5 questions pertaining to obesity assessment and treatment (see appendix 2).  
50  
51  
52  
53  
54  
55  
56 Knowledge scores were compared between the job groups using the Wilcoxon rank sum test. All questions  
57



## Identifying Opportunities for Advancing Weight Management in Primary Care

1  
2  
3 assessing respondent attitudes and behaviors were assessed using a 5-point Likert scale (ranging from strongly  
4 disagree to strongly agree). For analysis purposes responses for “Agree” and “Strongly Agree” were combined,  
5  
6 as were the responses of “Disagree” and “Strongly Disagree”. The resulting analysis variables had 3 levels  
7  
8 (1=Agree, 0=Neutral, and -1=Disagree). An exploratory factor analysis (EFA) was used to describe the factor  
9  
10 structure of the attitude and behavior questions. The EFA utilized Promax Rotation, due to the possible  
11  
12 correlated nature of the factors. Maximum likelihood was used as the extraction method. An initial scree plot  
13  
14 and eigenvalue table indicated that a 4 factor model was most appropriate. In order to assess internal consistency  
15  
16 Cronbach’s alpha was calculated for each factor. The four factors were then scored for each individual using  
17  
18 average of the items which loaded on the given factor, with some items reversed score for consistency. Factor  
19  
20 scores were compared between nurse and PCP groups using the Wilcoxon rank sum test. To supplement the  
21  
22 analysis of the factor score, the individual questions were summarized using frequency percentages with the  
23  
24 Wilcoxon rank sum test was used to compare responses between groups. In all cases, a two-tailed p-value of less  
25  
26 than 0.05 was considered significant. Statistical analysis was done using SAS statistical software, v 9.4.<sup>23</sup>  
27  
28  
29  
30  
31  
32  
33  
34  
35  
36  
37  
38  
39  
40  
41  
42  
43  
44  
45  
46  
47  
48  
49  
50  
51  
52  
53  
54  
55  
56  
57  
58  
59  
60

## Identifying Opportunities for Advancing Weight Management in Primary Care

**Results:**

Of the 674 surveys emailed, a total of 219 (32.3%) surveys were returned (137/437 (31.4%) from nurses and 82/237 (34.6%) from the licensed PCPs) (see Figure 1). Among those who responded to the survey, 85.8% were female, 93.6% were white non-Hispanic, 57.3% worked full time, 65.6% have worked in the same health care facility for 10 years or more, 59.6% were over 40 years of age, 31.5% had a BMI of 25-29.9 and 28% had a BMI over 30. These descriptive demographics are summarized for each of the job categories in Table 1.

The results of knowledge scores and questions pertaining to weight management training are shown in Table 2. The percentage of respondents who responded correctly to all 5 knowledge questions was highest for the PCPs. A statistically significant difference in knowledge scores was found between the two groups (Wilcoxon rank sum test  $p < 0.001$ ). The questions relating to types of training that the participants had been involved in showed consistent trends of nurses receiving less training than PCPs, even though all groups showed high levels of interest in further training. Figure 2 shows the reported frequency of performing various interventions with overweight or obese patients according to job group. In all cases, nurses were significantly less likely to report providing the given intervention compared to PCPs ( $p < 0.001$ ).

Results of the exploratory factor analysis of questions related to the four major factors are shown in Table 3. The four factors are labeled opportunity and practices, knowledge and confidence, attitudes, and beliefs. Survey questions that load above 0.3 were considered to be grouped within that factor. The Cronbach alpha showed that the factors had high internal consistency. Answers for all questions that loaded within a factor were added together for each subject and then the average score for each group was found. As seen in Table 4, *belief* scores were extremely high for both nurses and PCPs ( $0.99 \pm 0.06$  vs  $0.97 \pm 0.23$ ,  $p = 0.30$ ), indicating that nearly all respondents believed obesity to be a major health problem. The *attitudes* scores were similar for nurses and PCPs ( $-0.61 \pm 0.38$  vs  $-0.59 \pm 0.37$ ,  $p = 0.49$ ) with the average scores indicating that in general respondents do not endorse negative attitudes about patients who have overweight or obesity, however for both groups there was evidence of some unconscious bias; for example 7.3% of nurses and 17.3% of PCPs agreed with the statement “*obese patients lack motivation for lifestyle changes*” (see appendix table 3). The opportunity and practices score was lower for PCPs than nurses ( $-0.35 \pm 0.44$  vs  $-0.17 \pm 0.41$ ,  $p < 0.001$ ) with PCPs

## Identifying Opportunities for Advancing Weight Management in Primary Care

1  
2  
3 more likely to say that they lacked the time to discuss weight and they worried it would cause a poor patient-  
4 PCP relationship. The knowledge and confidence score also differed significantly between the groups, with  
5 nurses feeling less equipped to deal with weight management issues than PCPs ( $-0.42 \pm 0.43$  vs  $-0.03 \pm 0.55$ ,  
6  $p < 0.001$ ). Neither group was very confident, with those in the PCP group only answering with an average score  
7 of neutral. The responses to each individual question used in the survey are found in Appendix Tables 1-5.  
8  
9  
10  
11  
12  
13  
14  
15  
16  
17  
18  
19  
20  
21  
22  
23  
24  
25  
26  
27  
28  
29  
30  
31  
32  
33  
34  
35  
36  
37  
38  
39  
40  
41  
42  
43  
44  
45  
46  
47  
48  
49  
50  
51  
52  
53  
54  
55  
56  
57  
58  
59  
60

For Peer Review

## Identifying Opportunities for Advancing Weight Management in Primary Care

**Discussion:**

We analyzed data from 219 PCPs and nurses practicing within a community health system who responded to a survey concerning weight management. Resulting data showed that PCPs and nurses felt they needed more training on how to deal with patients' overweight and obesity issues irrespective the amount of prior training received in weight management. In addition, PCPs indicated two barriers: lack of time to discuss and/or fear of creating a poor patient-PCP relationship. While both PCPs and nurses agreed that they were not comfortable initiating discussion, nurses expressed higher level of discomfort. Nurses also felt less equipped compared to PCPs in dealing with weight management issues due to lack of training, inadequate specialty skills and/or they didn't wish to harm the patient-PCP relationship. In an analysis of the reported duration of time spent with patients in weight management intervention/discussion (Figure 2), it appears that nurses are underutilized in helping patients with weight management, which may partly explained why nurses reported lower confidence in assessment and intervention.

The findings from our survey are consistent with results from past surveys where physicians (i.e. – PCPs) similar reasons for not delivering weight management in their practices which included insufficient time,<sup>24</sup> insufficient training, and poor knowledge of the tools needed to diagnose and treat obesity.<sup>25-28</sup> There are multiple prior surveys of PCPs that have demonstrated that provider weight bias and stigma exist.<sup>29-35</sup> In our survey the overall average response did not indicate a negative bias toward overweight or obese patients, however approximately 5% of responders indicated that they were more irritated treating obese/overweight patients and over 10% indicated that obese overweight patients lacked motivation for lifestyle changes. It should also be noted that overall the respondents did indicate a lack of comfort with their skill level, lack of time, and concern about placing patients at a discomfort level or initiating feelings of guilt which reflect awareness of bias and stigma associated with obesity. Bias and stigma associated with obesity may be improving with time<sup>40</sup> and that is possibly why our levels were low. Further longitudinal studies of stigma and bias are needed. Bias, stigma as well as pessimism about weight-loss success<sup>29, 30, 32, 37, 38</sup> can all contribute negatively to patient care.<sup>39</sup>

## Identifying Opportunities for Advancing Weight Management in Primary Care

Some of the cited reasons why some PCPs prefer not to initiate a discussion on weight management include lack of competence on overweight and obesity care stemming from lack of training,<sup>5, 21</sup> concern about possible negative consequences elicited by introducing the topic to patients during a consultation, time constraints<sup>5, 21</sup> and limited resources to raise the sensitive topic,<sup>42</sup> especially if overweight and obesity are not the presenting complaint in a given consultation.<sup>43</sup> These reasons were echoed by the PCPs and nurses surveyed in this study. Consequently, there was also reported hesitancy among PCPs who indicated that they would not bring up the topic of weight management with their patients unless their patient brings it up first while patients felt that it is their PCPs responsibility to initiate the discussion.<sup>45-47</sup> In other cases, some patients had expressed frustration and anger when the PCP attributed all their presenting complaints to their weight.<sup>48</sup> This was corroborated by patients who had self-reported lower confidence in their PCPs' adequacy of necessary skills to help them with their weight management.<sup>15</sup> All of this data supports the presence of unmet need among PCPs for further training in the art of conversation with patients on sensitive topics such as those that revolve around weight, an observation which is corroborated by results from this survey where our PCPs and nurses have indicated that they would welcome additional training in weight management regardless of the amount of past training.

This consistent theme of inadequate training in obesity management was observed at early learning levels. A study that looked into nursing students' perception on obesity found that nursing curriculum lacked educational modules on obesity, and advanced communication skills training which led to lack of confidence and technical competence in weight management.<sup>49</sup> These nurses-in-training felt ill-equipped in their training and experience to address obesity: they lacked exposure to patients who were overweight or obese and were not taught strategies to facilitate behavior change and special communication skills to tackle sensitive health issues<sup>39</sup>. In a study of medical students, it had been shown that weight bias including negative attitudes that patients with obesity are lazy, non-compliant with treatment, less responsive to counselling, responsible for their condition, have no willpower, and deserve to be targets of derogatory humor, even in the clinical-care environment<sup>50, 51</sup> led to the opinion that treatment would be futile<sup>41</sup> and feelings of discomfort around patients with obesity, and decreased likelihood of initiating any conversation concerning weight management;<sup>52</sup> all of

## Identifying Opportunities for Advancing Weight Management in Primary Care

1  
2  
3 which contribute to failure in delivering appropriate health care. In another study done across medical schools  
4 in Norway, that compared senior medical students' knowledge on obesity to first year medical students,  
5  
6 knowledge gap was still seen among the senior students, with in understanding obesity, particularly with regard  
7  
8 to etiology, diagnosis, and treatment, despite a significant improvement in obesity knowledge during the course  
9  
10 of medical education. Responses to a knowledge/opinion survey showed negative attitudes towards time-  
11  
12 consuming follow-up, treatment outcomes, and confidence in weight management; where the majority of final-  
13  
14 year students perceived themselves as competent in treating patients with obesity, didn't have the confidence,  
15  
16 time, resources, and capacity to commit to long-term follow-up for patients with obesity.<sup>21</sup> Studies involving  
17  
18 medical students or residents have identified negative attitudes that patients with obesity are lazy, non-compliant  
19  
20 with treatment, less responsive to counselling, responsible for their condition, have no willpower, and deserve to  
21  
22 be targets of derogatory humor, even in the clinical-care environment.<sup>50, 51</sup> This leads physician trainees to the  
23  
24 opinion that treatment would be futile<sup>41</sup> and feelings of discomfort around patients with obesity, and decreased  
25  
26 likelihood of initiating any conversation concerning weight management;<sup>52</sup> all of which contribute to failure in  
27  
28 delivering appropriate health care.  
29  
30  
31

32  
33 On the flip side, in an earlier study of 586 nurses, nurses had confidence in their ability to give weight  
34  
35 loss advice, but didn't have high expectations that the patient would be compliant nor would that they would  
36  
37 lose weight, justifying their skill level as separate from the outcome.<sup>53</sup> Rather than believing that the poor  
38  
39 outcome may be due to lack of skill in the advice-giving, they preferred to believe that the failed outcome would  
40  
41 be due to patient poor motivation and non-compliance. This may imply bias and while a discussion of stigma  
42  
43 associated with obesity is beyond the scope of this paper, observations such as this provide valuable insight on  
44  
45 training focus.  
46

47  
48 Indeed, well-structured training would greatly benefit PCPs and nurses, and training programs should  
49  
50 emphasize the potential impact that language has when discussing obesity with patients; addressing any negative  
51  
52 emotional effect of the PCPs' language should be first and foremost. These can start with clear guidelines on  
53  
54 the terminology and the communication styles that should be used as a way to initiate the educational focus on  
55  
56 eliminating any unconscious acceptable form of prejudice/bias toward patients who are overweight or obese.<sup>18, 54</sup>  
57

## Identifying Opportunities for Advancing Weight Management in Primary Care

The program must include not just skills training but also awareness of the factors involved in both advice giving and self-appraisal.<sup>53</sup> Curricula that emphasize building skills in behavior change counseling techniques, with the opportunity to practice, engage patients, and receive feedback to hone counseling skills, are likely to improve clinician confidence in counseling and thus increase the likelihood of providing counseling on a routine basis.<sup>20</sup> This was corroborated by a study of medical students where it was found that factors associated with high self-competence included increased interaction with peers with obesity (39% vs. 49%,  $P < 0.001$ ) and increased partnership skills training (32% vs. 61%,  $P < 0.001$ ).<sup>55</sup> In one prime example of the impact education had in practice, Busch et al., found that an educational program to PCPs improved detection, documentation and follow-up/referral of pediatric obesity and co-morbid conditions by improving appropriate laboratory studies and referrals for patients with overweight by 10%.<sup>6</sup>

While appropriate training is essential, identifying opportunities when discussion can be initiated with patient is equally important. Figure 3 illustrates a breakdown of a hypothetical current practice with 3 prime points where initiating and reinforcing a weight management conversation is possible, within the health practice. The first two could be an opportunity for the nurse to intervene: taking the vitals, which includes weight and BMI recording in the EMR, and the health maintenance discussion. The next opportunity is with the PCP, when they come in for the health visit with the patient. If the nurse has already initiated the conversation and the patient seems amenable to continuing the conversation, it will be noted in the charts and the PCP can continue the conversation. This allows for three opportunities to intervene, which are now areas for growth within a clinical care practice.

Our study was unique in that we recorded responses across the professional HCP spectrum and not just in PCPs. Our study had a 32.3% return rate, which is high for an online survey distributed during the Holiday season, when the practice is at its peak. The 32.3% is larger than other comparable survey studies completed among health care PCPs which have varied from 11% to 30%,<sup>11, 56-59</sup> but lower for other studies which either used multiple targeted mailings during the spring months or monetary incentives and had a return range of 53% to 77%.<sup>5,31</sup> Limitations of this study include the fact that it is limited to one health care system, which limits generalizability of the findings. Given our response rate, our analysis was performed using a convenience

## Identifying Opportunities for Advancing Weight Management in Primary Care

1  
2  
3 sample which may have been influenced by unmeasurable nonresponse bias. Another limitation is that although  
4 we surveyed all PCPs and nurses within a community practice in one health care practice, our respondents were  
5 predominantly non-Hispanic White (93.6%) and female (85.8%). Despite the uniformity of the race and  
6 ethnicity of our population, the self-reported experiences and attitudes are similar to those identified by study  
7 samples of differing race.<sup>24-28</sup> Finally, the results of the factor analysis and the four resulting scale scores were  
8 used for analysis purposes in the present study. These scales should not be viewed as fully validated for use in  
9 future studies.  
10  
11  
12  
13  
14  
15  
16  
17  
18  
19

**Conclusion:**

20  
21  
22 This self-reported survey of Physicians, Nurse Practitioners, Physician Assistants, Licensed Practical  
23 Nurses and Registered Nurses found that past training in weight management received by HCPs are inadequate;  
24 more is needed and requested by those in practice. Within our health care practice, our PCPs and nurses did not  
25 endorse any negative attitudes about patients with overweight or obesity. They recognized that obesity is a  
26 major health problem; they wanted to do more but did not feel they have the skill to address this issue  
27 adequately. This survey has identified potential areas of growth - more educational training to our PCPs and  
28 nurses in weight management and allowing our practice nurses to lead the charge on initiating the discussion  
29 concerning weight management among patients with overweight and obesity issues.  
30  
31  
32  
33  
34  
35  
36  
37  
38  
39  
40  
41  
42  
43  
44  
45  
46  
47  
48  
49  
50  
51  
52  
53  
54  
55  
56  
57  
58  
59  
60



## Identifying Opportunities for Advancing Weight Management in Primary Care

**Funding**

This study was supported in part by our Institution. The data entry system used was RedCap, supported in part by the Center for Clinical and Translational Science award (UL1 TR000135) from the National Center for Advancing Translational Sciences (NCATS).

**Ethics and Consent to Participate**

In accordance with the Declaration of Helsinki, this study was reviewed and determined to be exempt (ID 18-007792) by the Institutional Review Board (IRB). The IRB approved passive consent was obtained for all study participants prior to study participation.

**Consent to Publish** – Not applicable

**Ethical Standards**

This study was reviewed by expedited process and determined to be EXEMPT from the requirement for Institutional Review Board Approval under 45 CFR 46.101b, item 2. All modifications to the study design or procedures continued to be submitted to the IRB during the study for determination on whether the study continued to be exempt. The oral contact cover letter (which served as the passive consent) and the survey were both reviewed by the IRB and noted. . Passive consent was obtained from all study participants prior to study initiation.

**Availability of Data and Materials**

All data supporting the study findings are contained within this manuscript

Identifying Opportunities for Advancing Weight Management in Primary Care

1  
2  
3  
4  
5  
6  
7  
8  
9  
10  
11  
12  
13  
14  
15  
16  
17  
18  
19  
20  
21  
22  
23  
24  
25  
26  
27  
28  
29  
30  
31  
32  
33  
34  
35  
36  
37  
38  
39  
40  
41  
42  
43  
44  
45  
46  
47  
48  
49  
50  
51  
52  
53  
54  
55  
56  
57  
58  
59  
60

**Figure Legend**

Figure1: participant flow in study from first study contact to last study contact.

[Insert Figure 1]

For Peer Review

Identifying Opportunities for Advancing Weight Management in Primary Care

Figure 2: Percent of time spent with overweight/obese patients addressing.....

[Insert Figure 2]

For Peer Review

Identifying Opportunities for Advancing Weight Management in Primary Care

1  
2  
3  
4  
5  
6  
7  
8  
9  
10  
11  
12  
13  
14  
15  
16  
17  
18  
19  
20  
21  
22  
23  
24  
25  
26  
27  
28  
29  
30  
31  
32  
33  
34  
35  
36  
37  
38  
39  
40  
41  
42  
43  
44  
45  
46  
47  
48  
49  
50  
51  
52  
53  
54  
55  
56  
57  
58  
59  
60

Figure 3: Opportunities for Growth with a Clinical Practice:

[Insert Figure 3]

For Peer Review

## Identifying Opportunities for Advancing Weight Management in Primary Care

Table 1: Demographics\*\*\*

|                                         | <i>Total</i><br>N=219 | <i>Nurse</i><br>N=137 | <i>PCP</i><br>N=82 |
|-----------------------------------------|-----------------------|-----------------------|--------------------|
| Female, N(%)                            | 187 (85.8%)*          | 130 (95.6%)*          | 57 (69.5%)         |
| White, Non-Hispanic                     | 205 (93.6%)**         | 128 (93.4%)*          | 77 (93.9%)*        |
| patient contact - based on 40 hour week | *                     |                       | *                  |
| 49% or less                             | 38 (17.4%)            | 31 (22.6%)            | 7 (8.6%)           |
| 50% to 74%                              | 51 (23.4%)            | 24 (17.5%)            | 27 (33.3%)         |
| 75% to 100%                             | 125 (57.3%)           | 78 (56.9%)            | 47 (58.0%)         |
| varies/supplemental                     | 4 (1.8%)              | 4 (2.9%)              | 0 (0%)             |
| Worked at the Institution               |                       |                       |                    |
| < 5 years                               | 45 (20.6%)            | 26 (19.0%)            | 19 (23.2%)         |
| 5-9 years                               | 31 (14.2%)            | 20 (14.6%)            | 11 (13.4%)         |
| 10-14 years                             | 40 (18.3%)            | 25 (18.2%)            | 15 (18.3%)         |
| 15-19 years                             | 38 (17.4%)            | 20 (14.6%)            | 18 (22.0%)         |
| 20-24 years                             | 14 (6.4%)             | 7 (5.1%)              | 7 (8.5%)           |
| 25 years or more                        | 51 (23.3%)            | 39 (28.5%)            | 12 (14.6%)         |
| Current age                             |                       |                       |                    |
| 30 years or less                        | 22 (10.1%)            | 17 (12.4%)            | 5 (6.1%)           |
| 31-40 years                             | 67 (30.6%)            | 36 (26.3%)            | 31 (37.8%)         |
| 41-50 years                             | 45 (20.6%)            | 24 (17.5%)            | 25 (30.5%)         |
| 51-60 years                             | 63 (28.8%)            | 50 (36.5%)            | 13 (15.9%)         |
| 60 years or more                        | 22 (10.1%)            | 10 (7.3%)             | 12 (14.6%)         |
| BMI range                               |                       |                       |                    |
| Below 25                                | 69 (31.5%)            | 30 (21.9%)            | 39 (47.6%)         |
| 25-29.9                                 | 69 (31.5%)            | 41 (29.9%)            | 28 (34.1%)         |
| 30-34.9                                 | 40 (18.3%)            | 31 (22.6%)            | 9 (11.0%)          |
| 35-39.9                                 | 17 (7.8%)             | 14 (10.2%)            | 3 (3.7%)           |
| 40-45.9                                 | 4 (1.8%)              | 4 (2.9%)              | 0 (0%)             |
| 46 and above                            | 0 (0%)                | 0 (0%)                | 0 (0%)             |
| Don't know                              | 20 (9.1%)             | 17 (12.4%)            | 3 (3.7%)           |

\*Data were missing for 1 respondent.

\*\*Data were missing for 2 respondents.

\*\*\*Data are presented as n (%).

## Identifying Opportunities for Advancing Weight Management in Primary Care

Table 2: Training and knowledge score results: Scale of 0 to 5, with 5 equal to all questions answered correctly.

|                                                                                     | <i>Total</i><br>N=219 | <i>Nurse</i><br>N=137 | <i>PCP</i><br>N=82 |
|-------------------------------------------------------------------------------------|-----------------------|-----------------------|--------------------|
| Knowledge Score, N (%)                                                              |                       |                       |                    |
| 0                                                                                   | 5 (2.2%)              | 4 (2.9%)              | 1 (1.2%)           |
| 1                                                                                   | 24 (11.0%)            | 22 (16.1%)            | 2 (2.4%)           |
| 2                                                                                   | 24 (11.0%)            | 21 (15.3%)            | 3 (3.7%)           |
| 3                                                                                   | 41 (18.7%)            | 27 (19.7%)            | 14 (17.1%)         |
| 4                                                                                   | 75 (34.3%)            | 43 (31.4%)            | 32 (39.0%)         |
| 5                                                                                   | 50 (22.8%)            | 20 (14.6%)            | 30 (36.6%)         |
| Median (25, 75)                                                                     | 4.0 (3, 4)            | 3.0 (2, 4)            | 4.0 (4, 5)         |
| Mean ± SD                                                                           | 3.40 ± 1.36           | 3.04 ± 1.40           | 4.00 ± 1.05        |
| p-value††                                                                           |                       | <0.001                |                    |
| During medical training, did you have any special training in weight management     | *                     |                       |                    |
| Yes                                                                                 | 18 (8.4%)             | 7 (5.2%)              | 11 (13.6%)         |
| No                                                                                  | 174 (80.9%)           | 112 (83.6%)           | 62 (76.5%)         |
| Don't remember                                                                      | 23 (10.7%)            | 15 (11.2%)            | 8 (9.9%)           |
| Since your medical training, have you had any special training in weight management | †                     |                       |                    |
| Yes, N (%)                                                                          | 65 (29.8%)            | 24 (17.6%)            | 41 (50.0%)         |
| Types of training (can choose more than one)                                        |                       |                       |                    |
| Lectures                                                                            | 37 (17.9)             | 9 (6.6%)              | 28 (34.1%)         |
| Classes                                                                             | 19 (8.7%)             | 13 (9.5%)             | 6 (7.3%)           |
| Conferences                                                                         | 43 (19.6%)            | 13 (9.5%)             | 30 (36.6%)         |
| Workshops                                                                           | 9 (4.1%)              | 5 (3.6%)              | 4 (4.9%)           |
| Fellowship training                                                                 | 0 (0%)                | 0 (0%)                | 0 (0%)             |
| Rotations                                                                           | 1 (0.5%)              | 0 (0%)                | 1 (1.2%)           |
| Would be interested in further training, N (%)                                      | 167 (77.3%)**         | 108 (79.4%)           | 59 (73.8%)         |

\*Data are missing for 4 respondents (3 Nurses, 1 PCP)

†Data are missing for 1 respondent (1 Nurse)

\*\*Data are missing for 3 respondents(1 Nurse, 2 PCP)

††Wilcoxon Rank Sum test was used to compare knowledge scores between nurses and PCPs.

## Identifying Opportunities for Advancing Weight Management in Primary Care

Table 3: Factor Pattern\*

|                                                                                      | <i>Opportunity and practices</i> | <i>Knowledge and confidence</i> | <i>Attitudes</i> | <i>Beliefs</i> |
|--------------------------------------------------------------------------------------|----------------------------------|---------------------------------|------------------|----------------|
| Practice is too busy to treat weight management                                      | 0.72                             |                                 |                  |                |
| Can handle treating comorbidities, but not lifestyle issues                          | 0.64                             |                                 |                  |                |
| Not comfortable initiating conversation                                              | 0.60                             |                                 |                  |                |
| Most patients with obesity live in denial, so I give general advice                  | 0.60                             |                                 |                  |                |
| Afraid of creating poor provider-patient dynamic by bringing up weight               | 0.58                             |                                 |                  |                |
| Few methods are effective at maintaining weight loss, so I give general advice       | 0.55                             |                                 |                  |                |
| Obesity is complex condition, so I prefer focus on treating comorbidities            | 0.46                             |                                 |                  |                |
| Feel comfortable discussing weight†                                                  | 0.44                             |                                 |                  |                |
| Duty to discuss weight, but long term follow-up is outside capacity in busy practice | 0.43                             |                                 |                  |                |
| Afraid to make patient feel guilty                                                   | 0.36                             |                                 |                  |                |
| More difficulty discussing obesity than sexuality                                    | 0.36                             |                                 |                  |                |
| Difficult to charge fees for suggesting simple changes in diet and exercise          | 0.34                             |                                 |                  |                |
| Know how to treat obese patients                                                     |                                  | 0.80                            |                  |                |
| Feel trained enough to intervene                                                     |                                  | 0.76                            |                  |                |
| Lack specialty skills to properly address problem †                                  |                                  | 0.61                            |                  |                |
| Know how to screen for eating disorders                                              |                                  | 0.50                            |                  |                |
| Confident assessing and managing eating disorders                                    |                                  | 0.45                            |                  |                |
| Taking care of obese patients requires specific training †                           |                                  | 0.32                            |                  |                |
| More irritated treating obese patients                                               |                                  |                                 | 0.85             |                |
| Disgust when treating obese patients                                                 |                                  |                                 | 0.79             |                |
| Difficult to feel empathy for obese patients                                         |                                  |                                 | 0.49             |                |
| Obese patients lack motivation for lifestyle changes                                 |                                  |                                 | 0.43             |                |
| Healthier to be underweight than overweight                                          |                                  |                                 | 0.41             |                |
| Dislike treating obese patients                                                      |                                  |                                 | 0.39             |                |
| Treating obese patients is rewarding †                                               |                                  |                                 | 0.37             |                |
| Obesity is a health problem                                                          |                                  |                                 |                  | 1.00           |
| Obesity itself is mortality risk factor                                              |                                  |                                 |                  | 0.74           |
| Obesity leads to serious medical complications                                       |                                  |                                 |                  | 0.70           |
| Standardized Cronbach alpha                                                          | 0.82                             | 0.77                            | 0.78             | 0.86           |

\*Factor loadings are presented from EFA with Promax rotation, extraction method = ML.

†Scale reversed

## Identifying Opportunities for Advancing Weight Management in Primary Care

Table 4: Factor scores

|                           | <i>Nurse</i>     |          | <i>PCP</i>       |          | <i>p-value*</i> |
|---------------------------|------------------|----------|------------------|----------|-----------------|
|                           | Mean $\pm$ SD    | Min, Max | Mean $\pm$ SD    | Min, Max |                 |
| Opportunity and practices | -0.17 $\pm$ 0.41 | -1, 0.75 | -0.35 $\pm$ 0.44 | -1, 0.83 | <0.001          |
| Knowledge and confidence  | -0.42 $\pm$ 0.43 | -1, 1    | -0.03 $\pm$ 0.55 | -1, 1    | <0.001          |
| Attitudes                 | -0.61 $\pm$ 0.38 | -1, 0.86 | -0.59 $\pm$ 0.37 | -1, 0.57 | 0.49            |
| Beliefs                   | 0.99 $\pm$ 0.06  | 0.33, 1  | 0.97 $\pm$ 0.23  | -1, 1    | 0.30            |

\*Wilcoxon rank sum test

On scale of -1 = disagree, 0 = neutral, 1 = agree. Average factor score was taken for each subject, and then an average score was calculated for each group.

For Peer Review



## Identifying Opportunities for Advancing Weight Management in Primary Care

Appendix Table 1: Opportunity and practices

|                                                                                      | <i>Nurse</i> |            |            | <i>PCP</i> |            |            | Missing | p-value* |
|--------------------------------------------------------------------------------------|--------------|------------|------------|------------|------------|------------|---------|----------|
|                                                                                      | Agree        | Neutral    | Disagree   | Agree      | Neutral    | Disagree   |         |          |
| Practice is too busy to treat weight management                                      | 18 (13.7%)   | 63 (48.1%) | 50 (38.2%) | 13 (16.9%) | 28 (36.4%) | 36 (46.8%) | 11      | 0.48     |
| Can handle treating comorbidities, but not lifestyle issues                          | 17 (13.1%)   | 78 (60.0%) | 35 (26.9%) | 16 (20.0%) | 25 (31.3%) | 39 (48.8%) | 9       | 0.07     |
| Not comfortable initiating conversation                                              | 35 (27.1%)   | 50 (38.8%) | 44 (34.1%) | 6 (7.5%)   | 15 (18.8%) | 59 (73.8%) | 10      | <0.001   |
| Most patients with obesity live in denial, so I give general advice                  | 9 (6.8%)     | 49 (37.1%) | 74 (56.1%) | 4 (5.0%)   | 17 (21.3%) | 59 (73.8%) | 7       | 0.01     |
| Afraid of creating poor provider-patient dynamic by bringing up weight               | 26 (19.9%)   | 61 (46.6%) | 44 (33.6%) | 20 (25.3%) | 14 (17.7%) | 45 (57.0%) | 9       | 0.05     |
| Few methods are effective at maintaining weight loss, so I give general advice       | 14 (10.7%)   | 58 (44.3%) | 59 (45.0%) | 17 (21.3%) | 20 (25.0%) | 43 (53.8%) | 8       | 0.79     |
| Obesity is complex condition, so I prefer focus on treating comorbidities            | 15 (11.2%)   | 76 (56.7%) | 43 (32.1%) | 11 (13.8%) | 23 (28.8%) | 46 (57.5%) | 5       | 0.006    |
| Feel comfortable discussing weight                                                   | 61 (45.2%)   | 46 (34.1%) | 28 (20.7%) | 58 (71.6%) | 16 (19.8%) | 7 (8.6%)   | 3       | <0.001   |
| Duty to discuss weight, but long term follow-up is outside capacity in busy practice | 29 (22.1%)   | 62 (47.3%) | 40 (30.5%) | 30 (37.5%) | 22 (27.5%) | 28 (35.0%) | 8       | 0.35     |
| Afraid to make patient feel guilty                                                   | 68 (50.4%)   | 28 (20.7%) | 39 (28.9%) | 34 (42.0%) | 15 (18.5%) | 32 (39.5%) | 3       | 0.14     |
| More difficulty discussing obesity than sexuality                                    | 27 (19.9%)   | 50 (36.8%) | 59 (42.4%) | 8 (9.9%)   | 20 (24.7%) | 53 (65.4%) | 2       | 0.002    |
| Difficult to charge fees for suggesting simple changes in diet and exercise          | 13 (9.8%)    | 95 (71.4%) | 25 (18.8%) | 30 (37.5%) | 14 (17.5%) | 36 (45.0%) | 6       | 0.88     |

\*Wilcoxon rank sum test

## Identifying Opportunities for Advancing Weight Management in Primary Care

Appendix Table 2: Knowledge and confidence

|                                                          | <i>Nurse</i> |            |            | <i>PCP</i> |            |            | Missing | p-value* |
|----------------------------------------------------------|--------------|------------|------------|------------|------------|------------|---------|----------|
|                                                          | Agree        | Neutral    | Disagree   | Agree      | Neutral    | Disagree   |         |          |
| Know how to treat obese patients                         | 13 (9.9%)    | 65 (49.2%) | 54 (40.9%) | 39 (48.8%) | 24 (30.0%) | 17 (21.3%) | 7       | <0.001   |
| Feel trained enough to intervene                         | 19 (14.2%)   | 57 (42.5%) | 58 (43.3%) | 43 (53.1%) | 23 (28.4%) | 15 (18.5%) | 4       | <0.001   |
| Lack specialty skills to properly address problem        | 62 (48.4%)   | 52 (40.6%) | 14 (10.9%) | 29 (36.3%) | 22 (27.5%) | 29 (36.3%) | 11      | 0.002    |
| Know how to screen for eating disorders                  | 9 (6.8%)     | 29 (22.0%) | 94 (71.2%) | 22 (27.2%) | 25 (30.9%) | 34 (42.0%) | 6       | <0.001   |
| Confident assessing and managing eating disorders        | 16 (11.8%)   | 47 (34.6%) | 73 (53.7%) | 12 (14.6%) | 30 (36.6%) | 40 (48.8%) | 1       | 0.44     |
| Taking care of obese patients requires specific training | 80 (59.7%)   | 39 (29.1%) | 15 (11.1%) | 41 (50.6%) | 20 (24.7%) | 20 (24.7%) | 4       | 0.06     |

\*Wilcoxon rank sum test

## Identifying Opportunities for Advancing Weight Management in Primary Care

Appendix Table 3: Attitudes

|                                                      | <i>Nurse</i> |            |             | <i>PCP</i> |            |            | Missing | p-value* |
|------------------------------------------------------|--------------|------------|-------------|------------|------------|------------|---------|----------|
|                                                      | Agree        | Neutral    | Disagree    | Agree      | Neutral    | Disagree   |         |          |
| More irritated treating obese patients               | 6 (4.4%)     | 32 (23.4%) | 99 (72.3%)  | 5 (6.3%)   | 18 (22.5%) | 57 (71.3%) | 2       | 0.82     |
| Disgust when treating obese patients                 | 2 (1.5%)     | 29 (21.2%) | 106 (77.4%) | 0 (0%)     | 11 (13.6%) | 70 (86.4%) | 1       | 0.10     |
| Difficult to feel empathy for obese patients         | 8 (5.8%)     | 23 (16.8%) | 106 (77.4%) | 4 (4.9%)   | 12 (14.8%) | 65 (80.3%) | 1       | 0.62     |
| Obese patients lack motivation for lifestyle changes | 10 (7.3%)    | 34 (24.8%) | 93 (67.9%)  | 14 (17.3%) | 19 (23.5%) | 48 (59.3%) | 1       | 0.10     |
| Healthier to be underweight than overweight          | 12 (8.8%)    | 30 (21.9%) | 95 (69.3%)  | 8 (9.8%)   | 26 (31.7%) | 48 (58.5%) | 0       | 0.14     |
| Dislike treating obese patients                      | 5 (3.7%)     | 34 (24.8%) | 98 (71.5%)  | 4 (4.9%)   | 23 (28.4%) | 54 (66.7%) | 1       | 0.44     |
| Treating obese patients is rewarding                 | 39 (28.9%)   | 87 (64.4%) | 9 (6.7%)    | 35 (44.3%) | 37 (46.8%) | 7 (8.9%)   | 5       | 0.08     |

\*Wilcoxon rank sum test

## Identifying Opportunities for Advancing Weight Management in Primary Care

Appendix Table 4: Beliefs

|                                            | <i>Nurse</i> |          |          | <i>PCP</i> |          |          | Missing | p-value* |
|--------------------------------------------|--------------|----------|----------|------------|----------|----------|---------|----------|
|                                            | Agree        | Neutral  | Disagree | Agree      | Neutral  | Disagree |         |          |
| Obesity is a health problem                | 136 (100%)   | 0 (0%)   | 0 (0%)   | 81 (98.8%) | 0 (0%)   | 1 (1.2%) | 1       | 0.20     |
| Obesity leads to serious med complications | 134 (99.3%)  | 0 (0%)   | 1 (0.7%) | 81 (98.8%) | 0 (0%)   | 1 (1.2%) | 2       | 0.73     |
| Obesity itself is mortality risk factor    | 134 (99.3%)  | 1 (0.7%) | 0 (0%)   | 77 (96.3%) | 2 (2.5%) | 1 (1.3%) | 4       | 0.12     |

For Peer Review

## Identifying Opportunities for Advancing Weight Management in Primary Care

Appendix Table 5: Questions that did not load into factors

|                                                              | <i>Nurse</i> |            |            | <i>PCP</i> |            |            | Missing | p-value* |
|--------------------------------------------------------------|--------------|------------|------------|------------|------------|------------|---------|----------|
|                                                              | Agree        | Neutral    | Disagree   | Agree      | Neutral    | Disagree   |         |          |
| Every visit appropriate time to discuss weight               | 65 (47.8%)   | 29 (21.3%) | 42 (30.9%) | 45 (56.3%) | 14 (17.5%) | 21 (26.3%) | 3       | 0.27     |
| Easier to help patient stop smoking than to help lose weight | 33 (24.3%)   | 56 (41.1%) | 47 (34.6%) | 34 (42.0%) | 20 (24.7%) | 27 (33.3%) | 2       | 0.10     |
| Health promotion is a priority in my area                    | 99 (73.9%)   | 25 (18.7%) | 10 (7.5%)  | 69 (85.2%) | 9 (11.1%)  | 3 (3.7%)   | 4       | 0.05     |
| Prefer to refer to specialty health services                 | 24 (18.6%)   | 80 (62.0%) | 25 (19.4%) | 18 (22.5%) | 27 (33.8%) | 35 (43.8%) | 10      | 0.03     |

\*Wilcoxon rank sum test

## Identifying Opportunities for Advancing Weight Management in Primary Care

## REFERENCES

1. Jensen M, Ryan D, Apovian C, et al. 2013 AHA/ACC/TOS Guideline for the Management of Overweight and Obesity in Adults. *J Am Coll Cardiol* 2014; 63: 2985-3023. DOI: 10.1016/j.jacc.2013.11.004.
2. Jensen MD, Ryan DH, Apovian CM, et al. 2013 AHA/ACC/TOS guideline for the management of overweight and obesity in adults: a report of the American College of Cardiology/American Heart Association Task Force on Practice Guidelines and The Obesity Society. *J Am Coll Cardiol* 2014; 63: 2985-3023. DOI: 10.1016/j.jacc.2013.11.004.
3. Centers for Medicare & Medicaid Services. Decision Memo for Intensive Behavioral Therapy for Obesity (CAG-00423N) <https://www.cms.gov/medicare-coverage-database/details/nca-decision-memo.aspx?&NcaName=Intensive%20Behavioral%20Therapy%20for%20Obesity&bc=ACAAAAAIAAA&NC AId=253&>. (accessed 12 April 2018).
4. Walsh K, Grech C and Hill K. Health advice and education given to overweight patients by primary care doctors and nurses: A scoping literature review. *Prev Med Rep* 2019; 14: 100812. 2019/02/26. DOI: 10.1016/j.pmedr.2019.01.016.
5. Petrin C, Kahan S, Turner M, et al. Current attitudes and practices of obesity counselling by health care providers. *Obes Res Clin Pract* 2017; 11: 352-359. 2016/08/30. DOI: 10.1016/j.orcp.2016.08.005.
6. Busch AM, Hubka A and Lynch BA. Primary Care Provider Knowledge and Practice Patterns Regarding Childhood Obesity. *J Pediatr Health Care* 2018; 32: 557-563. 2018/07/26. DOI: 10.1016/j.pedhc.2018.04.020.
7. Tsai AG, Abbo ED and Ogden LG. The time burden of overweight and obesity in primary care. *BMC Health Serv Res* 2011; 11: 191. 2011/08/19. DOI: 10.1186/1472-6963-11-191.
8. U. S. Preventive Services Task Force. Screening for obesity in adults: recommendations and rationale. *Ann Intern Med* 2003; 139: 930-932.
9. Wadden TA, Volger S, Sarwer DB, et al. A two-year randomized trial of obesity treatment in primary care practice. *N Engl J Med* 2011; 365: 1969-1979. 2011/11/16. DOI: 10.1056/NEJMoa1109220.
10. Koball AM, Mueller PS, Craner J, et al. Crucial conversations about weight management with healthcare providers: patients' perspectives and experiences. *Eat Weight Disord* 2018; 23: 87-94. DOI: 10.1007/s40519-016-0304-6.
11. Bucher Della Torre S, Courvoisier DS, Saldarriaga A, et al. Knowledge, attitudes, representations and declared practices of nurses and physicians about obesity in a university hospital: training is essential. *Clin Obes* 2018; 8: 122-130. DOI: 10.1111/cob.12238.
12. Turner M, Jannah N, Kahan S, et al. Current Knowledge of Obesity Treatment Guidelines by Health Care Professionals. *Obesity (Silver Spring)* 2018; 26: 665-671. DOI: 10.1002/oby.22142.
13. Wadden TA, Butryn ML, Hong PS, et al. Behavioral treatment of obesity in patients encountered in primary care settings: a systematic review. *JAMA* 2014; 312: 1779-1791. DOI: 10.1001/jama.2014.14173.
14. Croghan IT, Huber JM, Hurt RT, et al. Patient perception matters in weight management. *Prim Health Care Res Dev* 2018; 19: 197-204. DOI: 10.1017/S1463423617000585.
15. Croghan IT, Phelan SM, Bradley DP, et al. Needs Assessment for Weight Management: The Learning Health System Network Experience. *Mayo Clin Proc Innov Qual Outcomes* 2018; 2: 324-335. 2018/12/19. DOI: 10.1016/j.mayocpiqo.2018.08.001.
16. Teixeira FV, Pais-Ribeiro JL and Maia AR. Beliefs and practices of healthcare providers regarding obesity: a systematic review. *Rev Assoc Med Bras (1992)* 2012; 58: 254-262. 2012/05/10.
17. Bleich SN, Bennett WL, Gudzone KA, et al. National survey of US primary care physicians' perspectives about causes of obesity and solutions to improve care. *BMJ Open* 2012; 2 2012/12/22. DOI: 10.1136/bmjopen-2012-001871.
18. Wynn T, Islam N, Thompson C, et al. The effect of knowledge on healthcare professionals' perceptions of obesity. *Obesity Medicine* 2018; 11: 20-24. DOI: doi.org/10.1016/j.obmed.2018.06.006.

## Identifying Opportunities for Advancing Weight Management in Primary Care

19. Buffart LM, Allman-Farinelli M, King LA, et al. Are general practitioners ready and willing to tackle obesity management? *Obes Res Clin Pract* 2008; 2: I-II. 2008/09/01. DOI: 10.1016/j.orcp.2008.04.008.
20. Antognoli EL, Seeholzer EL, Gullett H, et al. Primary Care Resident Training for Obesity, Nutrition, and Physical Activity Counseling: A Mixed-Methods Study. *Health Promot Pract* 2017; 18: 672-680. 2016/07/13. DOI: 10.1177/1524839916658025.
21. Martins C and Norsett-Carr A. Obesity Knowledge among Final-Year Medical Students in Norway. *Obes Facts* 2017; 10: 545-558. 2017/11/22. DOI: 10.1159/000481351.
22. Consort: Transparent Reporting of Trials, [www.consort-statement.org/consort-statement/flow-diagram](http://www.consort-statement.org/consort-statement/flow-diagram) (accessed Aug 2016).
23. SAS Institute Inc. *SAS/STAT User's Guide - Version 9.4*. Cary, NC: SAS Institute, 2017.
24. Kushner R. Barriers to providing nutrition counseling by physicians: A survey of primary care practitioners. *Prev Med* 1995; 24: 546-552.
25. Flegal KM, Carroll MD, Ogden CL, et al. Prevalence and trends in obesity among US adults, 1999-2008. *JAMA* 2010; 303: 235-241. 2010/01/15. DOI: 10.1001/jama.2009.2014.
26. Forman-Hoffman V, Little A and Wahls T. Barriers to obesity management: a pilot study of primary care clinicians. *BMC Fam Pract* 2006; 7: 35. 2006/06/08. DOI: 10.1186/1471-2296-7-35.
27. Vetter ML, Herring SJ, Sood M, et al. What do resident physicians know about nutrition? An evaluation of attitudes, self-perceived proficiency and knowledge. *J Am Coll Nutr* 2008; 27: 287-298. 2008/08/12.
28. Jay M, Gillespie C, Ark T, et al. Do internists, pediatricians, and psychiatrists feel competent in obesity care?: using a needs assessment to drive curriculum design. *J Gen Intern Med* 2008; 23: 1066-1070. 2008/07/10. DOI: 10.1007/s11606-008-0519-y.
29. Price JH, Desmond SM, Krol RA, et al. Family practice physicians' beliefs, attitudes, and practices regarding obesity. *Am J Prev Med* 1987; 3: 339-345. 1987/11/01.
30. Huizinga MM, Cooper LA, Bleich SN, et al. Physician respect for patients with obesity. *J Gen Intern Med* 2009; 24: 1236-1239. 2009/09/19. DOI: 10.1007/s11606-009-1104-8.
31. Ferrante JM, Piasecki AK, Ohman-Strickland PA, et al. Family physicians' practices and attitudes regarding care of extremely obese patients. *Obesity (Silver Spring)* 2009; 17: 1710-1716. 2009/03/14. DOI: 10.1038/oby.2009.62.
32. Steeves JA, Liu B, Willis G, et al. Physicians' personal beliefs about weight-related care and their associations with care delivery: The U.S. National Survey of Energy Balance Related Care among Primary Care Physicians. *Obes Res Clin Pract* 2015; 9: 243-255. 2014/09/02. DOI: 10.1016/j.orcp.2014.08.002.
33. Epling JW, Morley CP and Ploutz-Snyder R. Family physician attitudes in managing obesity: a cross-sectional survey study. *BMC Res Notes* 2011; 4: 473. 2011/11/03. DOI: 10.1186/1756-0500-4-473.
34. Salinas GD, Glauser TA, Williamson JC, et al. Primary care physician attitudes and practice patterns in the management of obese adults: results from a national survey. *Postgrad Med* 2011; 123: 214-219. 2011/09/10. DOI: 10.3810/pgm.2011.09.2477.
35. Jay M, Kalet A, Ark T, et al. Physicians' attitudes about obesity and their associations with competency and specialty: a cross-sectional study. *BMC Health Serv Res* 2009; 9: 106. 2009/06/26. DOI: 10.1186/1472-6963-9-106.
36. Schwartz MB, Chambliss HO, Brownell KD, et al. Weight bias among health professionals specializing in obesity. *Obes Res* 2003; 11: 1033-1039. 2003/09/16. DOI: 10.1038/oby.2003.142.
37. Kristeller JL and Hoerr RA. Physician attitudes toward managing obesity: differences among six specialty groups. *Prev Med* 1997; 26: 542-549. 1997/07/01. DOI: 10.1006/pmed.1997.0171.
38. Huang J, Yu H, Marin E, et al. Physicians' weight loss counseling in two public hospital primary care clinics. *Acad Med* 2004; 79: 156-161. Research Support, Non-U.S. Gov't 2004/01/28.
39. Dietz WH, Baur LA, Hall K, et al. Management of obesity: improvement of health-care training and systems for prevention and care. *Lancet* 2015; 385: 2521-2533. 2015/02/24. DOI: 10.1016/S0140-6736(14)61748-7.

## Identifying Opportunities for Advancing Weight Management in Primary Care

40. Budd GM, Mariotti M, Graff D, et al. Health care professionals' attitudes about obesity: an integrative review. *Appl Nurs Res* 2011; 24: 127-137. 2010/10/27. DOI: 10.1016/j.apnr.2009.05.001.
41. Block JP, DeSalvo KB and Fisher WP. Are physicians equipped to address the obesity epidemic? Knowledge and attitudes of internal medicine residents. *Prev Med* 2003; 36: 669-675. 2003/05/15.
42. Blackburn M, Stathi A, Keogh E, et al. Raising the topic of weight in general practice: perspectives of GPs and primary care nurses. *BMJ Open* 2015; 5: e008546. 2015/08/09. DOI: 10.1136/bmjopen-2015-008546.
43. Mkhathshwa VB, Ogunbanjo GA and Mabuza LH. Knowledge, attitudes and management skills of medical practitioners regarding weight management. *Afr J Prim Health Care Fam Med* 2016; 8: e1-e9. 2017/02/06. DOI: 10.4102/phcfm.v8i1.1187.
44. Swift JA, Choi E, Puhl RM, et al. Talking about obesity with clients: preferred terms and communication styles of U.K. pre-registration dietitians, doctors, and nurses. *Patient Educ Couns* 2013; 91: 186-191. 2013/02/02. DOI: 10.1016/j.pec.2012.12.008.
45. Thomas SL, Hyde J, Karunaratne A, et al. Being 'fat' in today's world: a qualitative study of the lived experiences of people with obesity in Australia. *Health Expect* 2008; 11: 321-330. 2008/08/08. DOI: 10.1111/j.1369-7625.2008.00490.x.
46. Gray CM, Hunt K, Lorimer K, et al. Words matter: a qualitative investigation of which weight status terms are acceptable and motivate weight loss when used by health professionals. *BMC Public Health* 2011; 11: 513. 2011/07/01. DOI: 10.1186/1471-2458-11-513.
47. Tham M and Young D. The role of the General Practitioner in weight management in primary care--a cross sectional study in General Practice. *BMC Fam Pract* 2008; 9: 66. 2008/12/17. DOI: 10.1186/1471-2296-9-66.
48. Ward SH, Gray AM and Paranjape A. African Americans' perceptions of physician attempts to address obesity in the primary care setting. *J Gen Intern Med* 2009; 24: 579-584. 2009/03/12. DOI: 10.1007/s11606-009-0922-z.
49. Keyworth C, Peters S, Chisholm A, et al. Nursing students' perceptions of obesity and behaviour change: implications for undergraduate nurse education. *Nurse Educ Today* 2013; 33: 481-485. 2012/07/07. DOI: 10.1016/j.nedt.2012.05.016.
50. Swift JA, Hanlon S, El-Redy L, et al. Weight bias among UK trainee dietitians, doctors, nurses and nutritionists. *J Hum Nutr Diet* 2013; 26: 395-402. 2012/11/23. DOI: 10.1111/jhn.12019.
51. Wear D, Aultman JM, Varley JD, et al. Making fun of patients: medical students' perceptions and use of derogatory and cynical humor in clinical settings. *Acad Med* 2006; 81: 454-462. 2006/04/28. DOI: 10.1097/01.ACM.0000222277.21200.a1.
52. Pedersen PJ and Ketcham PL. Exploring the climate for overweight and obese students in a student health setting. *J Am Coll Health* 2009; 57: 465-469. 2008/12/31. DOI: 10.3200/JACH.57.4.471-480.
53. Hoppe R and Ogden J. Practice nurses' beliefs about obesity and weight related interventions in primary care. *Int J Obes Relat Metab Disord* 1997; 21: 141-146. 1997/02/01.
54. Bardia A, Holtan SG, Slezak JM, et al. Diagnosis of obesity by primary care physicians and impact on obesity management. *Mayo Clin Proc* 2007; 82: 927-932. 2007/08/04. DOI: 10.4065/82.8.927.
55. Doshi RS, Gudzone KA, Dyrbye LN, et al. Factors influencing medical student self-competence to provide weight management services. *Clin Obes* 2019; 9: e12288. 2018/10/26. DOI: 10.1111/cob.12288.
56. Anderson C, Peterson CB, Fletcher L, et al. Weight loss and gender: an examination of physician attitudes. *Obes Res* 2001; 9: 257-263. 2001/05/02. DOI: 10.1038/oby.2001.30.
57. Bleich SN, Bandara S, Bennett WL, et al. U.S. health professionals' views on obesity care, training, and self-efficacy. *Am J Prev Med* 2015; 48: 411-418. 2015/02/24. DOI: 10.1016/j.amepre.2014.11.002.
58. Zuzelo PR and Seminara P. Influence of registered nurses' attitudes toward bariatric patients on educational programming effectiveness. *J Contin Educ Nurs* 2006; 37: 65-73. 2006/08/04.



Identifying Opportunities for Advancing Weight Management in Primary Care

- 1  
2  
3  
4 59. Granara B and Laurent J. Provider attitudes and practice patterns of obesity management with  
5 pharmacotherapy. *J Am Assoc Nurse Pract* 2017; 29: 543-550. 2017/07/01. DOI: 10.1002/2327-  
6 6924.12481.  
7  
8  
9  
10  
11  
12  
13  
14  
15  
16  
17  
18  
19  
20  
21  
22  
23  
24  
25  
26  
27  
28  
29  
30  
31  
32  
33  
34  
35  
36  
37  
38  
39  
40  
41  
42  
43  
44  
45  
46  
47  
48  
49  
50  
51  
52  
53  
54  
55  
56  
57  
58  
59  
60

For Peer Review

1  
2  
3  
4  
5  
6  
7  
8  
9  
10  
11  
12  
13  
14  
15  
16  
17  
18  
19  
20  
21  
22  
23  
24  
25  
26  
27  
28  
29  
30  
31  
32  
33  
34  
35  
36  
37  
38  
39  
40  
41  
42  
43  
44  
45  
46  
47  
48  
49  
50  
51  
52  
53  
54  
55  
56  
57  
58  
59  
60

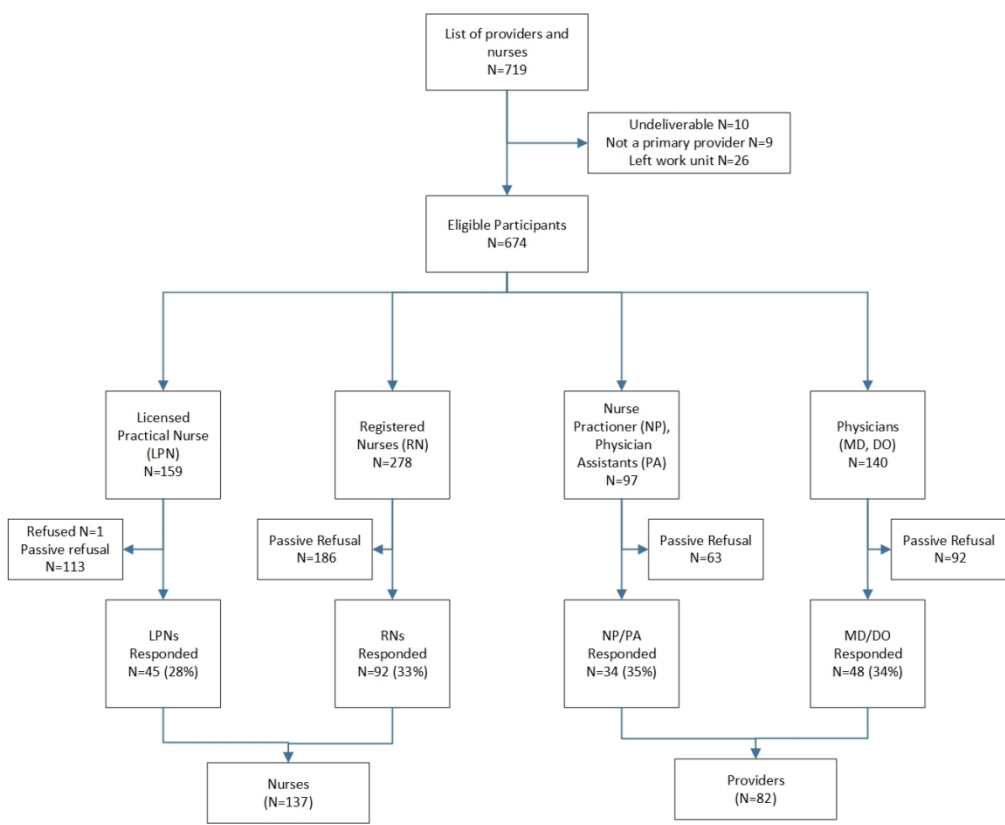

Figure 1

235x190mm (144 x 144 DPI)

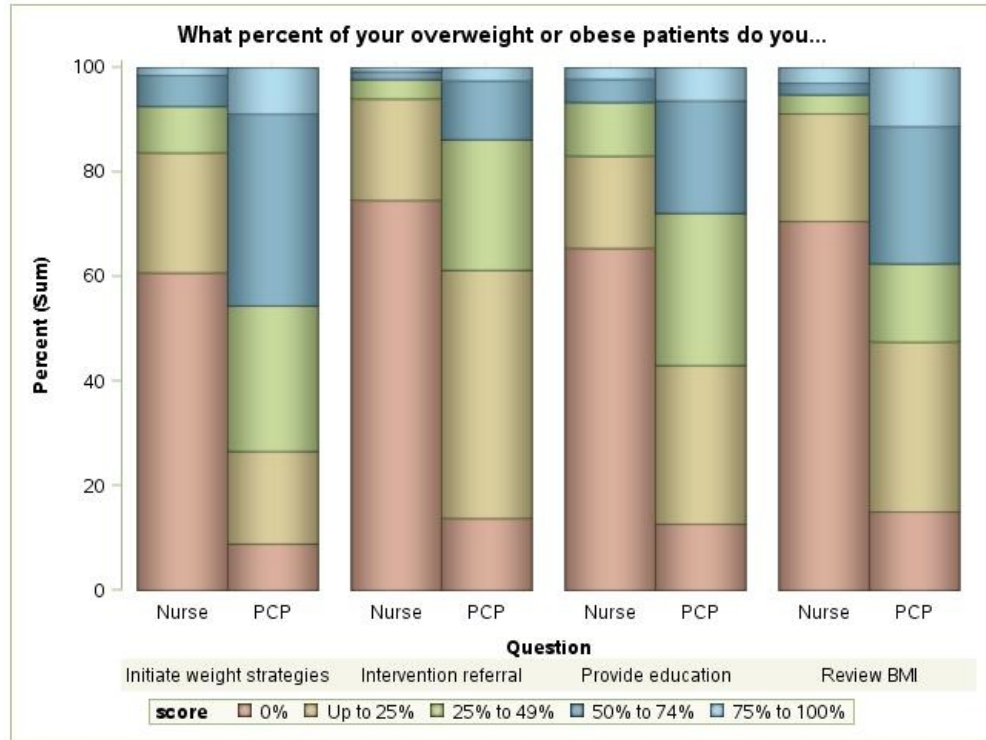

Figure 2

114x86mm (144 x 144 DPI)

1  
2  
3  
4  
5  
6  
7  
8  
9  
10  
11  
12  
13  
14  
15  
16  
17  
18  
19  
20  
21  
22  
23  
24  
25  
26  
27  
28  
29  
30  
31  
32  
33  
34  
35  
36  
37  
38  
39  
40  
41  
42  
43  
44  
45  
46  
47  
48  
49  
50  
51  
52  
53  
54  
55  
56  
57  
58  
59  
60

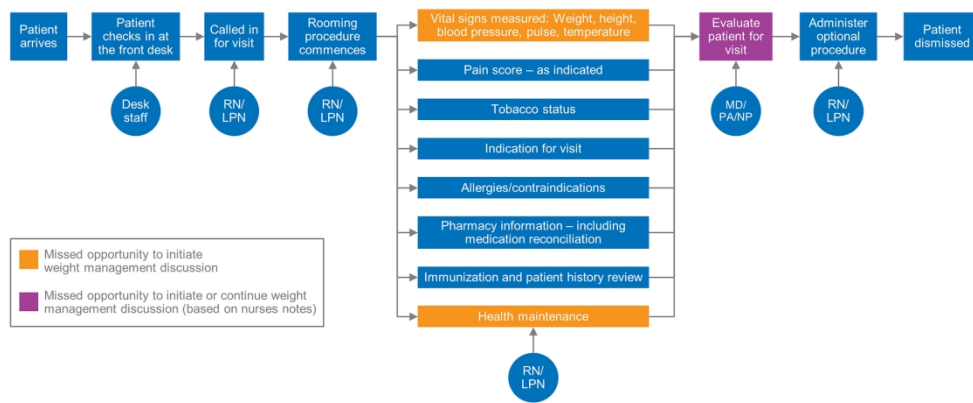

Figure 3

177x76mm (300 x 300 DPI)

To be completed by the owner of copyright in the Contribution

1 **Title of Article** : Identifying Opportunities for Advancing Weight Management in Primary Care  
 2 **Journal** : Journal of Primary Care and Community Health  
 3  
 4 **All Author(s)** : Ivana T. Croghan, PhD; Jon O. Ebbert, MD; Jane W. Njiru, MD; Tamim I. Rajjo, MD, MPH; Brian A. Lynch MD; Ramona S. DeJesus, MD; Michael D. Jensen, MD; Karen M. Flischer, MPH; Sean Phelan, PhD; Tara K.  
 5 **Corresponding Author** : Ivana T. Croghan, PhD  
 6  
 7 **Corr. Author Address** : Mayo Clinic, 200 First St., SW, Rochester, MN 55905

8  
 9 Please read the notes attached, then complete, sign and return this Agreement to the **Journal's Editorial Office**.

10 **The author who signs this Agreement certifies that he/she is authorized to sign on behalf of him/herself and in**  
 11 **the case of a multi-authored Contribution, on behalf of all other authors of the Contribution.** The authors  
 12 understand that they each have the option of signing and returning a separate copy of this Agreement. This  
 13 Agreement may be signed and executed by e-mail (a scanned hard copy of the Agreement with your signature on it or  
 14 a digital original copy with your electronic signature are equally acceptable), by traditional hard copy or by fax.  
 15

16 This Agreement will grant to the owners (the 'Proprietor') of the Journal identified above (the Journal title subject to  
 17 verification by SAGE Publishing ('SAGE')) a commercial license to produce, publish, sell and sub-license your article  
 18 ('Article') and any accompanying abstract or Supplemental Material (all materials collectively referenced as the  
 19 'Contribution'), in all languages and all formats through any medium of communication for the full legal term of  
 20 copyright (and any renewals) throughout the world. The Proprietor will publish the Contribution under the Creative  
 21 Commons license selected by you below. Where the selected license is CC BY-NC or other Creative Commons non-  
 22 commercial license, the Proprietor will receive exclusive commercial rights to the Article and non-exclusive  
 23 commercial rights to the abstract and Supplemental Material.  
 24

25 Payment of the applicable Article Processing Charge (APC)\* (+ VAT where applicable) stated on the Journal's  
 26 Manuscript Submission Guidelines and in effect on the date the Contribution is accepted for publication will be due  
 27 (payable by the author or their funder or institution) prior to publication of the Contribution. Please contact  
 28 [apcqueries@sagepub.com](mailto:apcqueries@sagepub.com) if you have any questions about the APC or any discounts that may be applicable to you.  
 29

30 **\* Discounts may apply:** **Promo Code:**  
 31 (If applicable, this section will be filled in by the Journal's Production Editor and is subject to final approval by SAGE)  
 32 **Your institution may have an Open Access Prepaid Account with SAGE. If so, the author should enter their institutional**  
 33 **Open Access Prepaid Account code below. In doing so the author warrants to SAGE that any necessary authorization for**  
 34 **use of the code has been sought and confirmed.**  
 35 **Open Access Prepaid Account Code** (List of participating institutions)  
 36  
 37  
 38

39 **Select ONE of the following:**

40 See SAGE Publishing website for info on re-use of OA content: <https://uk.sagepub.com/en-gb/eur/re-use-of-open-access-content>

- 41  **Creative Commons Attribution Non-Commercial 4.0 license (CC BY NC 4.0)**  
 42 This license allows others to re-use the Contribution without permission as long as the Contribution is properly  
 43 referenced and the use is non-commercial.  
 44  
 45  **Creative Commons Attribution 4.0 License (CC BY 4.0) (if required by funder)**  
 46 This license allows others to re-use the Contribution without permission as long as the Contribution is properly  
 47 referenced.  
 48  
 49 Some funders require you to publish your research under this license. Please check the SAGE Open Access  
 50 website (<https://uk.sagepub.com/en-gb/eur/funding-bodies-policies-and-compliance>) and indicate your funding  
 51 information below:  
 52  
 53 Funder: \_\_\_\_\_  
 54  
 55

56 **By signing this Contributor Agreement you agree both to the above provisions and to the Terms of the**  
 57 **Agreement attached below.**

58 **Contributor**  
 59 Signature: Ivana T. Croghan <http://mc.manuscriptcentral.com/site/abbrev>  
 60 Date: 07/29/2019

- \*\* If any author is an employee of the United States Government and prepared the Contribution as part of their official duties, please check here:

US Government Agency Name: \_\_\_\_\_

- If any author prepared the Contribution at the direction of their employer, please have a representative of your employer sign below, and please check here:

Employer Name: Mayo Foundation for Medical Education and Research

Authorized Signature: Kenna Atherton, Copyright Agent Digitally signed by Kenna Atherton, Copyright Agent, Date: 2019.07.26 12:15:36 -0500 Date signed: 07-29-2019

**\*\*U.S. Government work.** If the Contribution was not prepared as part of the Contributor's official duties, it is not a U.S. Government work. If the Contribution was jointly authored, all the co-authors must have been U.S. Government employees at the time they prepared the Contribution in order for it to be a U.S. Government work; if any co-author was not a U.S. Government employee, then the Contribution is not a U.S. Government work. If the Contribution was prepared under a U.S. Government contract or grant, it is not a U.S. Government work - in such case, copyright is usually owned by the contractor or grantee.

### TERMS OF THE AGREEMENT

#### Copyright.

While copyright remains yours as the author, you hereby authorize the Proprietor to act on your behalf to defend your copyright should it be infringed and to retain half of any damages awarded, after deducting costs.

#### Warranties.

You certify that:

- The Contribution is your original work and you have the right to enter into this Agreement and to convey the rights granted herein to the Proprietor.
- The Contribution is submitted for first publication in the Journal and is not being considered for publication elsewhere and has not already been published elsewhere, either in printed or electronic form (unless you have disclosed otherwise in writing to the Editor and approved by Editor).
- You have obtained and enclose all necessary permissions for the reproduction of any copyright works (e.g. quotes, photographs or other visual material, etc.) contained in the Contribution and not owned by you and that you have acknowledged all the source(s).
- The Contribution contains no violation of any existing copyright, other third party rights or any defamatory or untrue statements and does not infringe any rights of others.
- Any studies on which the Contribution is directly based were satisfactorily conducted in compliance with the governing Institutional Review Board (IRB) standards or were exempt from IRB requirements.

**You agree to indemnify the Proprietor, and its licensees and assigns, against any claims that result from your breach of the above warranties.**

#### Declaration of Conflicts of Interest.

You certify that:

1. All forms of financial support, including pharmaceutical company support, are acknowledged in the Contribution.
2. Any commercial or financial involvements that might present an appearance of a conflict of interest related to the Contribution are disclosed in the covering letter accompanying the Contribution and all such potential conflicts of interest will be discussed with the Editor as to whether disclosure of this information with the published Contribution is to be made in the Journal.
3. You have not signed an agreement with any sponsor of the research reported in the Contribution that prevents you from publishing both positive and negative results or that forbids you from publishing this research without the prior approval of the sponsor.
4. You have checked in the manuscript submission guidelines whether this Journal requires a Declaration of Conflicts of Interest and complied with the requirements specified where such a policy exists. It is not expected that the details of financial arrangements should be disclosed. If the Journal does require a Declaration of Conflicts of Interest and no conflicts of interest are declared, the following will be printed with your article: 'None Declared'.
5. You have checked the instructions to authors, and where declaration of grant funding is required, you have provided the appropriate information, in the format requested, within the submitted manuscript

**Supplemental Material.**

Journal name will be used here

Supplemental Material includes all material related to the Article, but not considered part of the Article, provided to the Proprietor by you as the Contributor. Supplemental Material may include, but is not limited to, datasets, audio-visual interviews including podcasts (audio only) and vodcasts (audio and visual), appendices, and additional text, charts, figures, illustrations, photographs, computer graphics, and film footage. Your grant of a non-exclusive right and license for these materials to the Proprietor in no way restricts re-publication of Supplemental Material by you or anyone authorized by you.

**Publishing Ethics & Legal Adherence.**

Contributions found to be infringing this Agreement may be subject to withdrawal from publication (see Termination below) and/or be subject to corrective action. The Proprietor (and/or SAGE if SAGE is different than the Proprietor) reserves the right to take action including, but not limited to: publishing an erratum or corrigendum (correction); retracting the Contribution; taking up the matter with the head of department or dean of the author's institution and/or relevant academic bodies or societies; or taking appropriate legal action.

**Contributor's Responsibilities with Respect to Third Party Materials.**

You are responsible for: (i) including full attribution for any materials not original to the Contribution; (ii) securing and submitting with the Contribution written permissions for any third party materials allowing publication in all media and all languages throughout the world for the full legal term of copyright; and (iii) making any payments due for such permissions. SAGE is a signatory of the STM Permissions Guidelines, which may be reviewed online.

**Termination.**

The Proprietor, in its sole, absolute discretion, may determine that the Contribution should not be published in the Journal. If the decision is made not to publish the Contribution after accepting it for publication, then all rights in the Contribution granted to the Proprietor shall revert to you and this Agreement shall be of no further force and effect. Any payment made by you to the Proprietor will be refunded, and neither you nor the Proprietor will have any obligation to the other with respect to the Contribution. In the event that payment of the applicable APC is not received by the Proprietor, this Agreement will be terminated.

**General Provisions.**

The validity, interpretation, performance and enforcement of this Agreement shall be governed as follows: (1) where the Journal is published by SAGE's offices in the United Kingdom, by English law and subject to the jurisdiction and venue of the English courts; (2) where the Journal is published by SAGE's offices in the United States, by the laws of the State of California and subject to the jurisdiction and venue of the courts of the State of California located in Ventura County and of the U.S. District Court for the Central District of California; and (3) where the Journal is published by SAGE's offices in Southeast Asia, by the laws of India and subject to the jurisdiction and venue of the Indian courts.

In the event a dispute arises out of or relating to this Agreement, the parties agree to first make a good-faith effort to resolve such dispute themselves. Upon failing, the parties shall engage in non-binding mediation with a mediator to be mutually agreed on by the parties. Any controversy or claim arising out of or relating to this Agreement, or the breach thereof, which the parties cannot settle themselves or through mediation, shall be settled by arbitration.

This transaction may be conducted by electronic means and the parties authorize that their electronic signatures act as their legal signatures of this Agreement. This Agreement will be considered signed by a party when his/her/its electronic signature is transmitted. Such signature shall be treated in all respects as having the same effect as an original handwritten signature. (You are not required to conduct this transaction by electronic means or use an electronic signature, but if you do so, then you hereby give your authorization pursuant to this paragraph.)

This Agreement constitutes the entire agreement between the parties with respect to its subject matter, and supersedes all prior and contemporaneous agreements, understandings and representations. The full terms of the CC BY license may be accessed here: <http://creativecommons.org/licenses/by/4.0/legalcode> and the full terms of the CC BY-NC license may be accessed here: <http://creativecommons.org/licenses/by-nc/4.0/legalcode>. The terms of both licenses are incorporated herein by reference.

No amendment or modification of any provision of this Agreement shall be valid or binding unless made in writing and signed by all parties.

**Consent for Commercial Electronic Messages.**

You hereby provide your express consent for the Proprietor, its affiliates and licensees (expressly including SAGE, where SAGE is not the Proprietor), and their respective designees to contact you in connection with any business communication or other correspondence. The parties agree that such consent may be withdrawn by you at a later time by providing written notice (including by email) to the Proprietor (and/or SAGE if different than the Proprietor). This clause shall survive expiration or earlier termination of this Agreement.
